# Supplementary material for: Cytoprotective role of humanin in lens epithelial cell oxidative stress-induced injury
Source: PubMed Central journal article supplement — Mol Med Rep. 2020 Jun 2;22(2):1467–79. doi: 10.3892/mmr.2020.11202 (PMC7339735; doi:10.3892/mmr.2020.11202), 2020-06-02

Figure S1. Apoptosis assay of HLECs under oxidative stress induced by serum starvation. After pretreatment with 50  $\mu$ M HN for 2 h or transfection with siHN for 48 h, cells were incubated in serum-free medium after being rinsed twice with PBS, for 72 h before experiments. Cells incubated in DMEM containing 10% FBS were considered the nutrients group. (A) Annexin V/PI staining was detected by flow cytometry and (B) the results were quantified. Data are presented as the mean  $\pm$  SD,  $n=3$ , \* $P<0.05$ , \*\* $P<0.01$ , \*\*\* $P<0.001$ . HN, humanin; HLECs, human lens epithelial cells; siHN, HN siRNA; siRNA, small interfering RNA; NC, negative control; Cont, control.

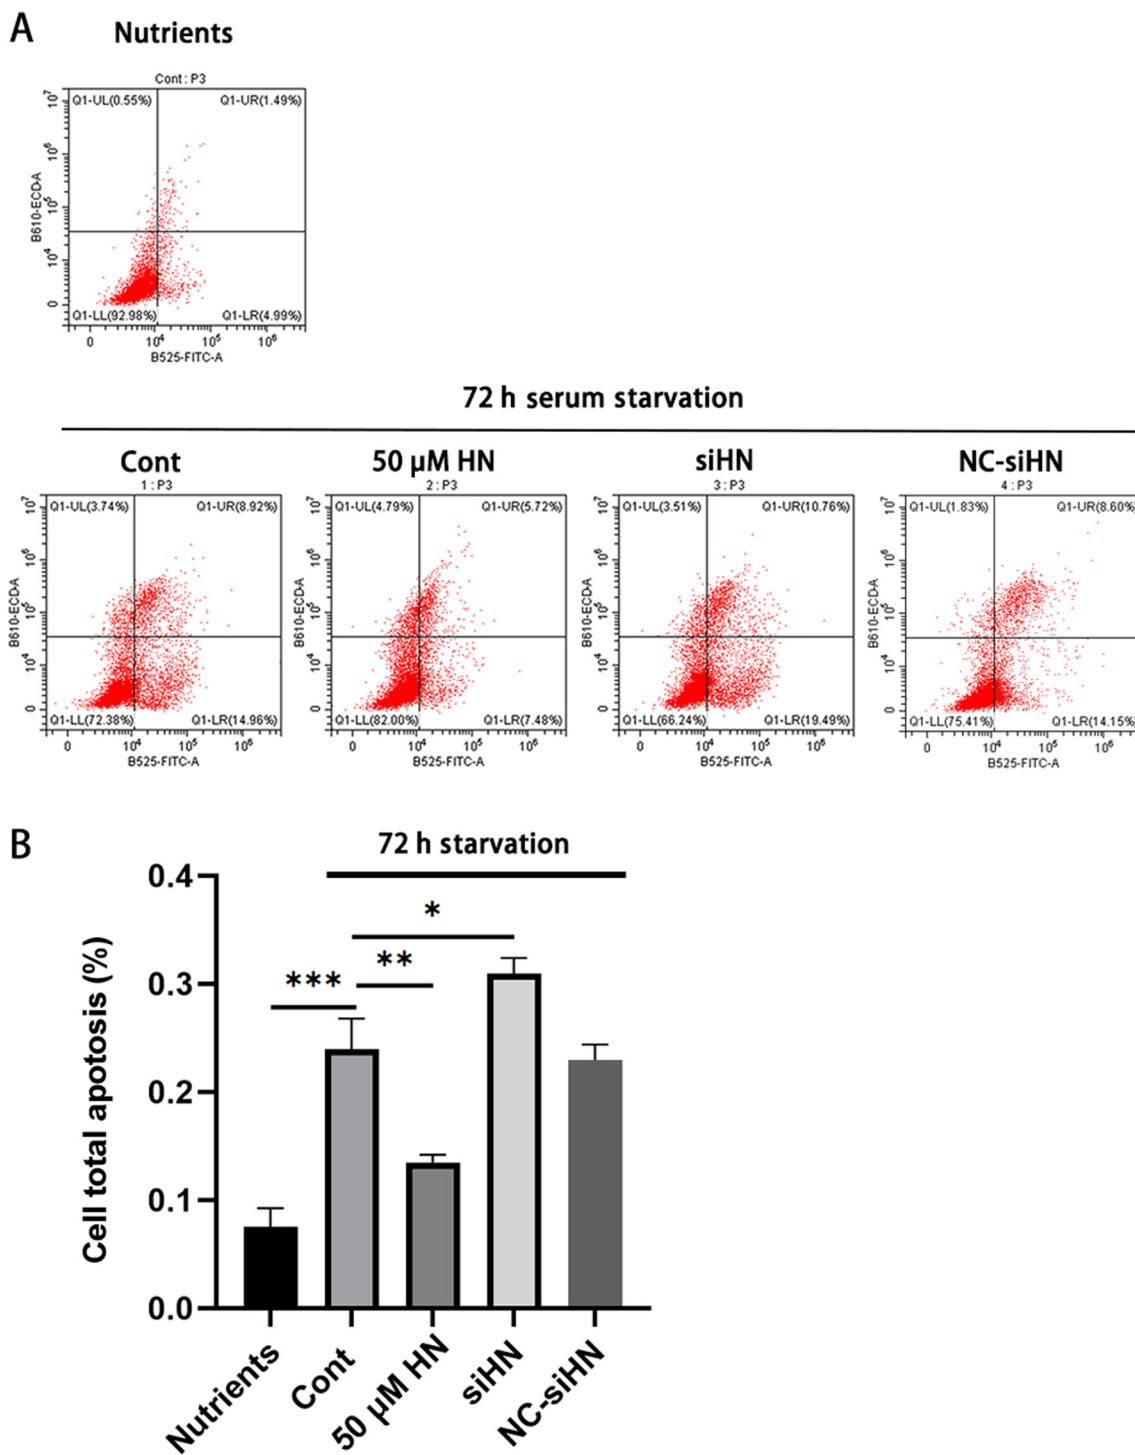

Supplement: Supplementary_Data.pdf [file Supplementary_Data.pdf]
